# Supplementary material
Source: HighWire-hosted journal article supplement (https://www.jneurosci.org/content/39/15/2951)
Supplement: inline-supplementary-material-8 [file inline-supplementary-material-8.xlsx]

## Sheet: Sheet1
Detailed results of statistical analyses (results are organized by figures)
Table 1-1 Nec-1s only, dose-response
Source of Variation	% of total variation	P value	P value summary	Significant?
Interaction	0.0566	0.7414	ns	No
IHC, OHC, Casp-3 positive cells	99.06	<0.0001	****	Yes
Nec-1s doses	0.0521	0.3271	ns	No
ANOVA table	SS	DF	MS	F (DFn, DFd)	P value
Interaction	13.96	8	1.744	F (8, 75) = 0.6403	P=0.7414
IHC, OHC, Casp-3 positive cells	24423	2	12212	F (2, 75) = 4482	P<0.0001
Nec-1s doses	12.84	4	3.211	F (4, 75) = 1.179	P=0.3271
Residual	204.3	75	2.724
Dunnett's multiple comparisons test	Mean Diff.	95.00% CI of diff.	Significant?	Summary	Adjusted P Value
IHC
vehicle vs. Nec-1s (0.2 uM)	0.3333	-2.044 to 2.711	No	ns	0.9903
vehicle vs. Nec-1s (1 uM)	0.6667	-1.711 to 3.044	No	ns	0.8924
vehicle vs. Nec-1s (3 uM)	0.8333	-1.544 to 3.211	No	ns	0.7951
vehicle vs. Nec-1s (10 uM)	0	-2.378 to 2.378	No	ns	>0.9999
OHC
vehicle vs. Nec-1s (0.2 uM)	1	-1.378 to 3.378	No	ns	0.6775
vehicle vs. Nec-1s (1 uM)	2.333	-0.04432 to 4.711	No	ns	0.056
vehicle vs. Nec-1s (3 uM)	2.333	-0.04432 to 4.711	No	ns	0.056
vehicle vs. Nec-1s (10 uM)	1.5	-0.8777 to 3.878	No	ns	0.3329
Casp-3
vehicle vs. Nec-1s (0.2 uM)	0	-2.378 to 2.378	No	ns	>0.9999
vehicle vs. Nec-1s (1 uM)	0	-2.378 to 2.378	No	ns	>0.9999
vehicle vs. Nec-1s (3 uM)	-0.1667	-2.544 to 2.211	No	ns	0.9991
vehicle vs. Nec-1s (10 uM)	0	-2.378 to 2.378	No	ns	>0.9999
Table 1-2 Kan 1000 + Nec-1s, dose-response
Source of Variation	% of total variation	P value	P value summary	Significant?
Interaction	23.32	<0.0001	****	Yes
IHC, OHC or Casp-3 positive cell	68.06	<0.0001	****	Yes
Kan + varying Nec-1s conc	1.044	0.0374	*	Yes
ANOVA table	SS	DF	MS	F (DFn, DFd)	P value
Interaction	2480	10	248	F (10, 90) = 27.71	P<0.0001
IHC, OHC or Casp-3 positive cell	7239	2	3620	F (2, 90) = 404.3	P<0.0001
Kan + varying Nec-1s conc	111.1	5	22.21	F (5, 90) = 2.482	P=0.0374
Residual	805.7	90	8.952
Dunnett's multiple comparisons test	Mean Diff.	95.00% CI of diff.	Significant?	Summary	Adjusted P Value
IHC
Kan 1000 + Nec-1s (0 uM) vs. vehicle	-2.833	-7.253 to 1.586	No	ns	0.3411
Kan 1000 + Nec-1s (0 uM) vs. Kan 1000 + Nec-1s (0.2 uM)	-1	-5.42 to 3.42	No	ns	0.9682
Kan 1000 + Nec-1s (0 uM) vs. Kan 1000 + Nec-1s (1 uM)	0.5	-3.92 to 4.92	No	ns	0.9983
Kan 1000 + Nec-1s (0 uM) vs. Kan 1000 + Nec-1s (3 uM)	-0.5	-4.92 to 3.92	No	ns	0.9983
Kan 1000 + Nec-1s (0 uM) vs. Kan 1000 + Nec-1s (10 uM)	-1.333	-5.753 to 3.086	No	ns	0.9029
OHC
Kan 1000 + Nec-1s (0 uM) vs. vehicle	-17.83	-22.25 to -13.41	Yes	****	<0.0001
Kan 1000 + Nec-1s (0 uM) vs. Kan 1000 + Nec-1s (0.2 uM)	1.5	-2.92 to 5.92	No	ns	0.8544
Kan 1000 + Nec-1s (0 uM) vs. Kan 1000 + Nec-1s (1 uM)	0.5	-3.92 to 4.92	No	ns	0.9983
Kan 1000 + Nec-1s (0 uM) vs. Kan 1000 + Nec-1s (3 uM)	-1.667	-6.086 to 2.753	No	ns	0.7968
Kan 1000 + Nec-1s (0 uM) vs. Kan 1000 + Nec-1s (10 uM)	-0.1667	-4.586 to 4.253	No	ns	0.9999
Casp-3
Kan 1000 + Nec-1s (0 uM) vs. vehicle	15.17	10.75 to 19.59	Yes	****	<0.0001
Kan 1000 + Nec-1s (0 uM) vs. Kan 1000 + Nec-1s (0.2 uM)	0.5	-3.92 to 4.92	No	ns	0.9983
Kan 1000 + Nec-1s (0 uM) vs. Kan 1000 + Nec-1s (1 uM)	2.833	-1.586 to 7.253	No	ns	0.3411
Kan 1000 + Nec-1s (0 uM) vs. Kan 1000 + Nec-1s (3 uM)	5	0.5803 to 9.42	Yes	*	0.0206
Kan 1000 + Nec-1s (0 uM) vs. Kan 1000 + Nec-1s (10 uM)	3.667	-0.7531 to 8.086	No	ns	0.137
Table 1-3 Cis 100 + Nec-1s, dose-response
Source of Variation	% of total variation	P value	P value summary	Significant?
Interaction	4.928	<0.0001	****	Yes
IHC, OHC, or Casp-3 positive cell	90.38	<0.0001	****	Yes
Cis 100 + varying Nec-1s conc	0.437	0.1115	ns	No
ANOVA table	SS	DF	MS	F (DFn, DFd)	P value
Interaction	805.3	10	80.53	F (10, 90) = 10.42	P<0.0001
IHC, OHC, or Casp-3 positive cell	14768	2	7384	F (2, 90) = 955.3	P<0.0001
Cis 100 + varying Nec-1s conc	71.41	5	14.28	F (5, 90) = 1.848	P=0.1115
Residual	695.7	90	7.73
Dunnett's multiple comparisons test	Mean Diff.	95.00% CI of diff.	Significant?	Summary	Adjusted P Value
IHC
Cis 100 + Nec-1s (0 uM) vs. vehicle	-0.5	-4.607 to 3.607	No	ns	0.998
Cis 100 + Nec-1s (0 uM) vs. Cis 100 + Nec-1s (0.2 uM)	0.5	-3.607 to 4.607	No	ns	0.998
Cis 100 + Nec-1s (0 uM) vs. Cis 100 + Nec-1s (1 uM)	0.5	-3.607 to 4.607	No	ns	0.998
Cis 100 + Nec-1s (0 uM) vs. Cis 100 + Nec-1s (3 uM)	1.333	-2.774 to 5.44	No	ns	0.8746
Cis 100 + Nec-1s (0 uM) vs. Cis 100 + Nec-1s (10 uM)	1	-3.107 to 5.107	No	ns	0.9571
OHC
Cis 100 + Nec-1s (0 uM) vs. vehicle	-10.17	-14.27 to -6.06	Yes	****	<0.0001
Cis 100 + Nec-1s (0 uM) vs. Cis 100 + Nec-1s (0.2 uM)	-0.6667	-4.774 to 3.44	No	ns	0.9927
Cis 100 + Nec-1s (0 uM) vs. Cis 100 + Nec-1s (1 uM)	0.6667	-3.44 to 4.774	No	ns	0.9927
Cis 100 + Nec-1s (0 uM) vs. Cis 100 + Nec-1s (3 uM)	2.167	-1.94 to 6.274	No	ns	0.527
Cis 100 + Nec-1s (0 uM) vs. Cis 100 + Nec-1s (10 uM)	1.5	-2.607 to 5.607	No	ns	0.8159
Casp-3
Cis 100 + Nec-1s (0 uM) vs. vehicle	7.167	3.06 to 11.27	Yes	***	0.0001
Cis 100 + Nec-1s (0 uM) vs. Cis 100 + Nec-1s (0.2 uM)	0.3333	-3.774 to 4.44	No	ns	0.9997
Cis 100 + Nec-1s (0 uM) vs. Cis 100 + Nec-1s (1 uM)	1	-3.107 to 5.107	No	ns	0.9571
Cis 100 + Nec-1s (0 uM) vs. Cis 100 + Nec-1s (3 uM)	0.8333	-3.274 to 4.94	No	ns	0.9799
Cis 100 + Nec-1s (0 uM) vs. Cis 100 + Nec-1s (10 uM)	-0.3333	-4.44 to 3.774	No	ns	0.9997
Table 1-4 Cis 100 + Various conditions
Source of Variation	% of total variation	P value	P value summary	Significant?
Interaction	6.658	<0.0001	****	Yes
IHC, OHC, Casp-3 positive cells	90.47	<0.0001	****	Yes
Cis + vasrious conditions	0.1805	0.0658	ns	No
ANOVA table	SS (Type III)	DF	MS	F (DFn, DFd)	P value
Interaction	1384	8	173	F (8, 78) = 42.48	P<0.0001
IHC, OHC, Casp-3 positive cells	18809	2	9404	F (2, 78) = 2309	P<0.0001
Cis + vasrious conditions	37.53	4	9.382	F (4, 78) = 2.303	P=0.0658
Residual	317.7	78	4.074
Dunnett's multiple comparisons test	Mean Diff.	95.00% CI of diff.	Significant?	Summary	Adjusted P Value
IHC
Cis 100 vs. vehicle	-0.5	-3.405 to 2.405	No	ns	0.9794
Cis 100 vs. Cis 100 +Nec1s	1.571	-1.228 to 4.371	No	ns	0.4362
Cis 100 vs. Cis 100 +zVAD	-0.6667	-3.572 to 2.238	No	ns	0.9438
Cis 100 vs. Cis 100 +Nec1s+zVAD	-0.6667	-3.572 to 2.238	No	ns	0.9438
OHC
Cis 100 vs. vehicle	-10	-12.9 to -7.095	Yes	****	<0.0001
Cis 100 vs. Cis 100 +Nec1s	1.667	-1.238 to 4.572	No	ns	0.4168
Cis 100 vs. Cis 100 +zVAD	-9.667	-12.57 to -6.762	Yes	****	<0.0001
Cis 100 vs. Cis 100 +Nec1s+zVAD	-10.17	-13.07 to -7.262	Yes	****	<0.0001
Casp-3
Cis 100 vs. vehicle	7.833	5.034 to 10.63	Yes	****	<0.0001
Cis 100 vs. Cis 100 +Nec1s	-1.5	-4.405 to 1.405	No	ns	0.5103
Cis 100 vs. Cis 100 +zVAD	7.667	4.762 to 10.57	Yes	****	<0.0001
Cis 100 vs. Cis 100 +Nec1s+zVAD	7.69	4.891 to 10.49	Yes	****	<0.0001
Table 1-5 Kan 1000 + Various conditions
Source of Variation	% of total variation	P value	P value summary	Significant?
Interaction	22.52	<0.0001	****	Yes
IHC, OHC, or Casp-3 positive cell	73.73	<0.0001	****	Yes
Kan + various	0.1842	0.1096	ns	No
ANOVA table	SS (Type III)	DF	MS	F (DFn, DFd)	P value
Interaction	4275	8	534.4	F (8, 78) = 119.6	P<0.0001
IHC, OHC, or Casp-3 positive cell	13996	2	6998	F (2, 78) = 1566	P<0.0001
Kan + various	34.96	4	8.74	F (4, 78) = 1.956	P=0.1096
Residual	348.6	78	4.469
Dunnett's multiple comparisons test	Mean Diff.	95.00% CI of diff.	Significant?	Summary	Adjusted P Value
IHC
Kan 1000 vs. vehicle	-4	-7.043 to -0.9573	Yes	**	0.0058
Kan 1000 vs. Kan 1000 +Nec1s	-0.2143	-3.146 to 2.718	No	ns	0.999
Kan 1000 vs. Kan 1000 +zVAD	-2.667	-5.709 to 0.3761	No	ns	0.1024
Kan 1000 vs. Kan 1000+Nec1s+zVAD	-2.833	-5.876 to 0.2094	No	ns	0.0753
OHC
Kan 1000 vs. vehicle	-16	-19.04 to -12.96	Yes	****	<0.0001
Kan 1000 vs. Kan 1000 +Nec1s	2	-1.043 to 5.043	No	ns	0.2985
Kan 1000 vs. Kan 1000 +zVAD	-16.83	-19.88 to -13.79	Yes	****	<0.0001
Kan 1000 vs. Kan 1000+Nec1s+zVAD	-15.67	-18.71 to -12.62	Yes	****	<0.0001
Casp-3
Kan 1000 vs. vehicle	15.5	12.57 to 18.43	Yes	****	<0.0001
Kan 1000 vs. Kan 1000 +Nec1s	-2.333	-5.376 to 0.7094	No	ns	0.1808
Kan 1000 vs. Kan 1000 +zVAD	15.33	12.29 to 18.38	Yes	****	<0.0001
Kan 1000 vs. Kan 1000+Nec1s+zVAD	15.5	12.57 to 18.43	Yes	****	<0.0001
Table 2-1 (Effect of 3 mg/kg or 0.3 mg/kg Nec-1s on kanamycin/furosemide-induced ABR threshold shift). Detailed statistical results are presented for the summary plot only.
Source of Variation	% of total variation	P value	P value summary	Significant?
Interaction	1.332	0.7017	ns	No
ABR frequency	0.6195	0.6353	ns	No
Nec1s Treatment	71.18	<0.0001	****	Yes
ANOVA table	SS (Type III)	DF	MS	F (DFn, DFd)	P value
Interaction	532.3	8	66.54	F (8, 110) = 0.6875	P=0.7017
ABR frequency	247.6	4	61.9	F (4, 110) = 0.6397	P=0.6353
Nec1s Treatment	28448	2	14224	F (2, 110) = 147	P<0.0001
Residual	10645	110	96.78
Tukey's multiple comparisons test	Mean Diff.	95.00% CI of diff.	Significant?	Summary	Adjusted P Value
WT vs. Nec-1s (3 mg/kg)	33.01	28.31 to 37.71	Yes	****	<0.0001
WT vs. Nec-1s (0.3 mg/kg)	6.255	0.6169 to 11.89	Yes	*	0.0258
Nec-1s (3 mg/kg) vs. Nec-1s (0.3 mg/kg)	-26.76	-32.59 to -20.93	Yes	****	<0.0001
Table 2-2 (Effect of 3 mg/kg or 0.3 mg/kg Nec-1s on kanamycin/furosemide-induced ABR threshold shift), 2 or 14 days after withdrawl of Nec-1s
Source of Variation	% of total variation	P value	P value summary	Significant?
Interaction	0.7469	0.9986	ns	No
ABR frequency	0.7466	0.6965	ns	No
Nec-1s treatment, 3 or 0.3 mg/kg, and D2 or D14	78.18	<0.0001	****	Yes
ANOVA table	SS (Type III)	DF	MS	F (DFn, DFd)	P value
Interaction	226.5	12	18.87	F (12, 60) = 0.1849	P=0.9986
ABR frequency	226.4	4	56.59	F (4, 60) = 0.5545	P=0.6965
Nec-1s treatment, 3 or 0.3 mg/kg, and D2 or D14	23703	3	7901	F (3, 60) = 77.42	P<0.0001
Residual	6123	60	102.1
Tukey's multiple comparisons test	Mean Diff.	95.00% CI of diff.	Significant?	Summary	Adjusted P Value
Nec-1s (3 mg/kg) - D2 vs. Nec-1s (3 mg/kg) - D14	10	0.2522 to 19.75	Yes	*	0.0423
Nec-1s (3 mg/kg) - D2 vs. Nec-1s (0.3 mg/kg) - D2	-28.73	-37.45 to -20.01	Yes	****	<0.0001
Nec-1s (3 mg/kg) - D2 vs. Nec-1s (0.3 mg/kg) - D14	-31.13	-39.85 to -22.41	Yes	****	<0.0001
Nec-1s (3 mg/kg) - D14 vs. Nec-1s (0.3 mg/kg) - D2	-38.73	-47.45 to -30.01	Yes	****	<0.0001
Nec-1s (3 mg/kg) - D14 vs. Nec-1s (0.3 mg/kg) - D14	-41.13	-49.85 to -32.41	Yes	****	<0.0001
Nec-1s (0.3 mg/kg) - D2 vs. Nec-1s (0.3 mg/kg) - D14	-2.4	-9.951 to 5.151	No	ns	0.8352
Table 3-1 (Effect of 3 mg/kg or 0.3 mg/kg Nec-1s on cisplatin/furosemide-induced ABR threshold shift). Detailed statistical results are presented for the summary plot only.
Source of Variation	% of total variation	P value	P value summary	Significant?
Interaction	0.3504	0.9989	ns	No
ABR frequency	0.3902	0.915	ns	No
Nec-1s treatment	52.45	<0.0001	****	Yes
ANOVA table	SS (Type III)	DF	MS	F (DFn, DFd)	P value
Interaction	165.5	8	20.69	F (8, 115) = 0.1079	P=0.9989
ABR frequency	184.3	4	46.08	F (4, 115) = 0.2403	P=0.9150
Nec-1s treatment	24773	2	12386	F (2, 115) = 64.61	P<0.0001
Residual	22048	115	191.7
Tukey's multiple comparisons test	Mean Diff.	95.00% CI of diff.	Significant?	Summary	Adjusted P Value
WT (DMSO) vs. Nec-1s (3 mg/kg)	26.9	20.32 to 33.48	Yes	****	<0.0001
WT (DMSO) vs. Nec-1s (0.3 mg/kg)	-3.567	-11.16 to 4.026	No	ns	0.5066
Nec-1s (3 mg/kg) vs. Nec-1s (0.3 mg/kg)	-30.47	-38.06 to -22.87	Yes	****	<0.0001
Table 3-2 (Effect of 3 mg/kg or 0.3 mg/kg Nec-1s on cisplatin/furosemide-induced ABR threshold shift), 2 or 14 days after withdrawl of Nec-1s
Source of Variation	% of total variation	P value	P value summary	Significant?
Interaction	1.139	0.8772	ns	No
ABR frequency	0.5465	0.534	ns	No
Nec-1s treatment and post-withdrawal time	81.03	<0.0001	****	Yes
ANOVA table	SS	DF	MS	F (DFn, DFd)	P value
Interaction	636.3	12	53.02	F (12, 100) = 0.549	P=0.8772
ABR frequency	305.4	4	76.35	F (4, 100) = 0.7906	P=0.5340
Nec-1s treatment and post-withdrawal time	45283	3	15094	F (3, 100) = 156.3	P<0.0001
Residual	9658	100	96.58
Tukey's multiple comparisons test	Mean Diff.	95.00% CI of diff.	Significant?	Summary	Adjusted P Value
Nec-1s (3 mg/kg) - D10 vs. Nec-1s (3 mg/kg) - D24	-1	-7.63 to 5.63	No	ns	0.9791
Nec-1s (3 mg/kg) - D10 vs. Nec-1s (0.3 mg/kg) - D10	-24	-30.63 to -17.37	Yes	****	<0.0001
Nec-1s (3 mg/kg) - D10 vs. Nec-1s (0.3 mg/kg) - D24	-47.33	-53.96 to -40.7	Yes	****	<0.0001
Nec-1s (3 mg/kg) - D24 vs. Nec-1s (0.3 mg/kg) - D10	-23	-29.63 to -16.37	Yes	****	<0.0001
Nec-1s (3 mg/kg) - D24 vs. Nec-1s (0.3 mg/kg) - D24	-46.33	-52.96 to -39.7	Yes	****	<0.0001
Nec-1s (0.3 mg/kg) - D10 vs. Nec-1s (0.3 mg/kg) - D24	-23.33	-29.96 to -16.7	Yes	****	<0.0001
Table 4-1 (ABR thresholds of Casp8/Ripk3 DOKO mice at different ages)
8-weeks
Source of Variation	% of total variation	P value	P value summary	Significant?
Interaction	0.3953	0.9904	ns	No
ABR frequency	0.1715	0.9981	ns	No
Genotype	2.924	0.1498	ns	No
ANOVA table	SS	DF	MS	F (DFn, DFd)	P value
Interaction	33.13	4	8.281	F (4, 70) = 0.07168	P=0.9904
ABR frequency	14.38	4	3.594	F (4, 70) = 0.03111	P=0.9981
Genotype	245	1	245	F (1, 70) = 2.121	P=0.1498
Residual	8088	70	115.5
11-weeks
Source of Variation	% of total variation	P value	P value summary	Significant?
Interaction	10.33	0.1215	ns	No
ABR frequency	15.71	0.03	*	Yes
Genotype	0.6162	0.5018	ns	No
ANOVA table	SS (Type III)	DF	MS	F (DFn, DFd)	P value
Interaction	612.1	4	153	F (4, 51) = 1.919	P=0.1215
ABR frequency	930.8	4	232.7	F (4, 51) = 2.917	P=0.0300
Genotype	36.5	1	36.5	F (1, 51) = 0.4576	P=0.5018
Residual	4068	51	79.76
14-weeks
Source of Variation	% of total variation	P value	P value summary	Significant?
Interaction	11.85	0.1576	ns	No
ABR frequency	10.88	0.1909	ns	No
Genotype	3.415	0.1633	ns	No
ANOVA table	SS (Type III)	DF	MS	F (DFn, DFd)	P value
Interaction	382.9	4	95.73	F (4, 44) = 1.743	P=0.1576
ABR frequency	351.7	4	87.93	F (4, 44) = 1.601	P=0.1909
Genotype	110.4	1	110.4	F (1, 44) = 2.01	P=0.1633
Residual	2416	44	54.91
20-weeks
Source of Variation	% of total variation	P value	P value summary	Significant?
Interaction	1.909	0.9249	ns	No
ABR frequency	2.576	0.8769	ns	No
Genotype	4.491	0.1561	ns	No
ANOVA table	SS (Type III)	DF	MS	F (DFn, DFd)	P value
Interaction	409.6	4	102.4	F (4, 42) = 0.2216	P=0.9249
ABR frequency	552.7	4	138.2	F (4, 42) = 0.299	P=0.8769
Genotype	963.6	1	963.6	F (1, 42) = 2.085	P=0.1561
Residual	19407	42	462.1
Table 5-1(Effect of Casp8/Ripk3 genotype on kanamycin/furosemide-induced ABR threshold shift). Detailed statistical results are presented for the summary plot only.
Source of Variation	% of total variation	P value	P value summary	Significant?
Interaction	0.8993	0.6668	ns	No
ABR frequency	0.5662	0.4563	ns	No
Genotype	76.88	<0.0001	****	Yes
ANOVA table	SS (Type III)	DF	MS	F (DFn, DFd)	P value
Interaction	641.1	8	80.13	F (8, 140) = 0.7277	P=0.6668
ABR frequency	403.6	4	100.9	F (4, 140) = 0.9163	P=0.4563
Genotype	54805	2	27403	F (2, 140) = 248.9	P<0.0001
Residual	15416	140	110.1
Tukey's multiple comparisons test	Mean Diff.	95.00% CI of diff.	Significant?	Summary	Adjusted P Value
WT vs. Ripk3 KO	30.65	25.8 to 35.51	Yes	****	<0.0001
WT vs. Casp8/Ripk3 DOKO	44.45	39.6 to 49.31	Yes	****	<0.0001
Ripk3 KO vs. Casp8/Ripk3 DOKO	13.8	8.828 to 18.77	Yes	****	<0.0001
Table 5-2 (Effect of Casp8/Ripk3 genotype on kanamycin-only-induced ABR threshold shift). Detailed statistical results are presented for the summary plot only.
Source of Variation	% of total variation	P value	P value summary	Significant?
Interaction	3.433	0.2599	ns	No
ABR frequency	2.621	0.3985	ns	No
Genotype	33.89	<0.0001	****	Yes
ANOVA table	SS (Type III)	DF	MS	F (DFn, DFd)	P value
Interaction	1296	4	324.1	F (4, 95) = 1.343	P=0.2599
ABR frequency	989.7	4	247.4	F (4, 95) = 1.025	P=0.3985
Genotype	12794	1	12794	F (1, 95) = 53	P<0.0001
Residual	22931	95	241.4
Table 6-1 (Effect of Casp8/Ripk3 genotype on cisplatin/furosemide-induced ABR threshold shift). Detailed statistical results are presented for the summary plot only.
Source of Variation	% of total variation	P value	P value summary	Significant?
Interaction	0.8154	0.9258	ns	No
ABR frequency	0.6087	0.6791	ns	No
Genotype	65.7	<0.0001	****	Yes
ANOVA table	SS (Type III)	DF	MS	F (DFn, DFd)	P value
Interaction	455.5	8	56.94	F (8, 125) = 0.3872	P=0.9258
ABR frequency	340.1	4	85.01	F (4, 125) = 0.5781	P=0.6791
Genotype	36702	2	18351	F (2, 125) = 124.8	P<0.0001
Residual	18383	125	147.1
Tukey's multiple comparisons test	Mean Diff.	95.00% CI of diff.	Significant?	Summary	Adjusted P Value
WT vs. Ripk3 KO	30.48	24.37 to 36.58	Yes	****	<0.0001
WT vs. Casp8 / Ripk3 DOKO	35.9	30.15 to 41.65	Yes	****	<0.0001
Ripk3 KO vs. Casp8 / Ripk3 DOKO	5.425	-0.6769 to 11.53	No	ns	0.0921
Table 7-1 (Hair cell counts of Kanamycin/furosemide-exposed mice) (for OHCs only)
Source of Variation	% of total variation	P value	P value summary	Significant?
Interaction	7.816	0.0085	**	Yes
ABR frequency	7.411	0.0003	***	Yes
Genotype or Nec-1s treatment	59.04	<0.0001	****	Yes
ANOVA table	SS (Type III)	DF	MS	F (DFn, DFd)	P value
Interaction	4313	6	718.9	F (6, 63) = 3.188	P=0.0085
Cochlear position	4090	2	2045	F (2, 63) = 9.067	P=0.0003
Genotype or Nec-1s treatment	32582	3	10861	F (3, 63) = 48.16	P<0.0001
Residual	14208	63	225.5
Tukey's multiple comparisons test	Mean Diff.	95.00% CI of diff.	Significant?	Summary	Adjusted P Value
WT vs. Ripk3 KO	-8.947	-21.64 to 3.749	No	ns	0.2558
WT vs. Casp8/Ripk3 DOKO	-52.5	-65.38 to -39.62	Yes	****	<0.0001
WT vs. WT+Nec-1s (3 mg/kg)	-3.611	-16.49 to 9.265	No	ns	0.8805
Ripk3 KO vs. Casp8/Ripk3 DOKO	-43.55	-56.59 to -30.52	Yes	****	<0.0001
Ripk3 KO vs. WT+Nec-1s (3 mg/kg)	5.336	-7.699 to 18.37	No	ns	0.7027
Casp8/Ripk3 DOKO vs. WT+Nec-1s (3 mg/kg)	48.89	35.68 to 62.1	Yes	****	<0.0001
Table 7-2 (Hair cell counts of Cisplatin/furosemide-exposed mice) (for OHCs only)
Source of Variation	% of total variation	P value	P value summary	Significant?
Interaction	5.007	0.2394	ns	No
ABR frequency	18.4	<0.0001	****	Yes
Genotype or Nec-1s treatmen t	32.65	<0.0001	****	Yes
ANOVA table	SS	DF	MS	F (DFn, DFd)	P value
Interaction	3433	6	572.2	F (6, 72) = 1.367	P=0.2394
Cochlear position	12617	2	6308	F (2, 72) = 15.08	P<0.0001
Genotype or Nec-1s treatmen t	22388	3	7463	F (3, 72) = 17.83	P<0.0001
Residual	30129	72	418.5
Tukey's multiple comparisons test	Mean Diff.	95.00% CI of diff.	Significant?	Summary	Adjusted P Value
WT vs. Ripk3 KO	-34.52	-51.13 to -17.92	Yes	****	<0.0001
WT vs. Casp8/Ripk3 DOKO	-40.71	-57.32 to -24.11	Yes	****	<0.0001
WT vs. WT+Nec-1s (3 mg/kg)	-13.33	-29.94 to 3.27	No	ns	0.1591
Ripk3 KO vs. Casp8/Ripk3 DOKO	-6.19	-22.79 to 10.41	No	ns	0.7609
Ripk3 KO vs. WT+Nec-1s (3 mg/kg)	21.19	4.587 to 37.79	Yes	**	0.0068
Casp8/Ripk3 DOKO vs. WT+Nec-1s (3 mg/kg)	27.38	10.78 to 43.98	Yes	***	0.0003
Table 7-3 (Hair cell counts of kanamycin-only exposed mice) (OHCs only)
Source of Variation	% of total variation	P value	P value summary	Significant?
Interaction	4.496	0.0006	***	Yes
ABR frequency	75.95	<0.0001	****	Yes
Genotype	8.691	<0.0001	****	Yes
ANOVA table	SS (Type III)	DF	MS	F (DFn, DFd)	P value
Interaction	2277	2	1138	F (2, 33) = 9.304	P=0.0006
Cochlear position	38461	2	19231	F (2, 33) = 157.2	P<0.0001
Genotype	4401	1	4401	F (1, 33) = 35.97	P<0.0001
Residual	4038	33	122.3
Sidak's multiple comparisons test	Mean Diff.	95.00% CI of diff.	Significant?	Summary	Adjusted P Value
WT - Casp8/Ripk3 DOKO
Apical	-0.4762	-15.95 to 15	No	ns	0.9998
Mid	-26.55	-42.02 to -11.07	Yes	***	0.0004
Base	-36.9	-52.38 to -21.43	Yes	****	<0.0001
Test details	Mean 1	Mean 2	Mean Diff.	SE of diff.	N1	N2	t	DF
WT - Casp8/Ripk3 DOKO
Apical	97.86	98.33	-0.4762	6.154	7	6	0.07738	33
Mid	69.29	95.83	-26.55	6.154	7	6	4.314	33
Base	6.429	43.33	-36.9	6.154	7	6	5.997	33
